# Supplementary material for: The complete mitochondrial genome of Taxus cuspidata (Taxaceae): eight protein-coding genes have transferred to the nuclear genome
Source: PubMed Central journal article supplement (PMC6971862; doi:10.1186/s12862-020-1582-1), 2020-01-20
Supplement: 12862_2020_1582_MOESM4_ESM.pdf [file 12862_2020_1582_MOESM4_ESM.pdf]

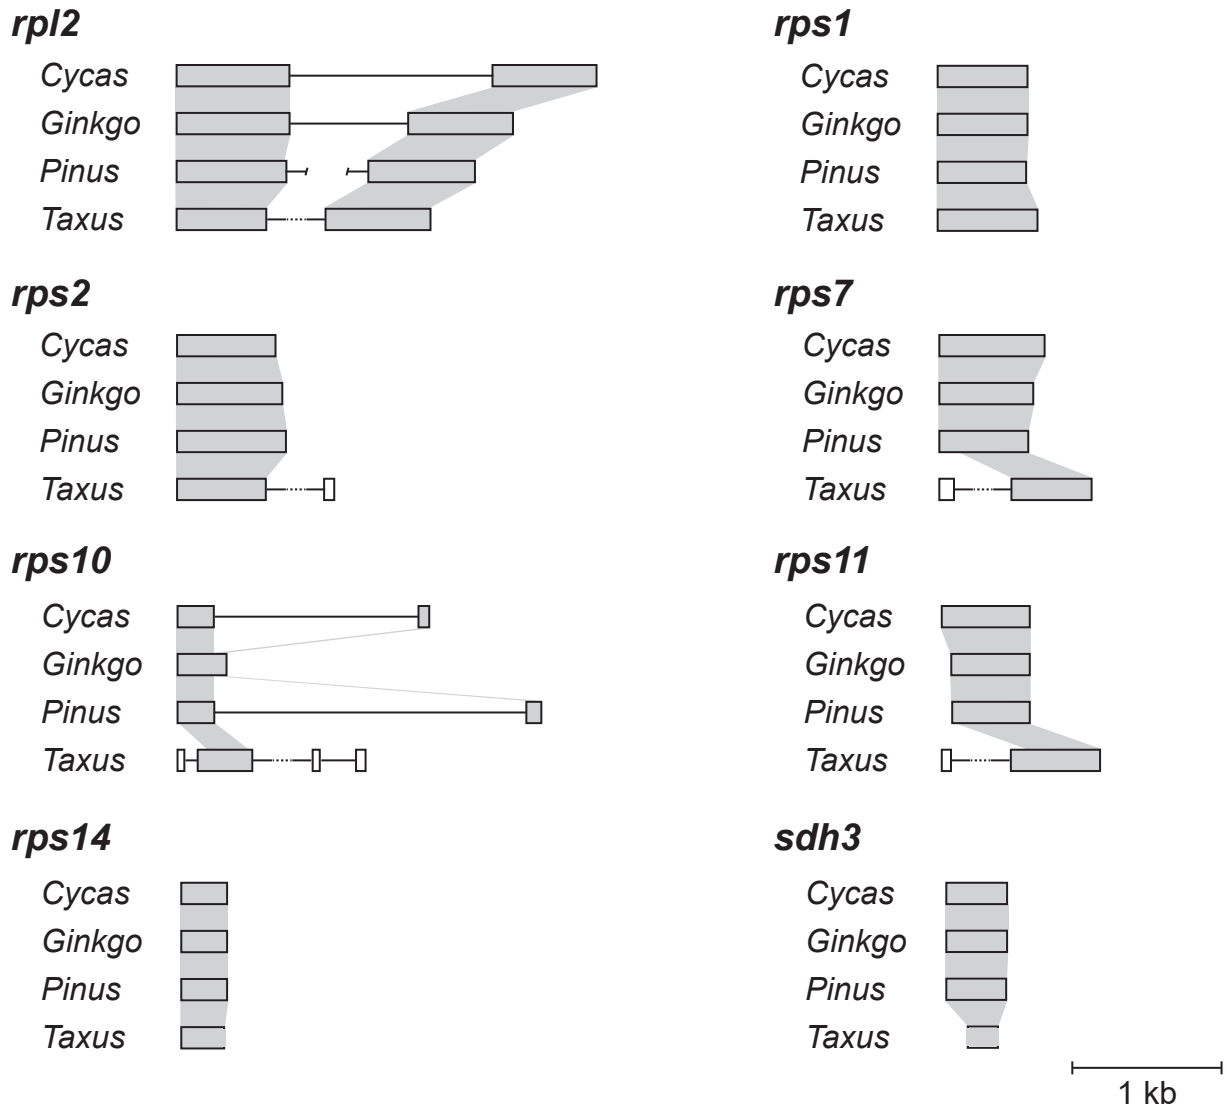

**Additional file 4: Figure S2.** Structure of transferred genes in *Taxus* and their counterparts in *Cycas*, *Ginkgo* and *Pinus*. Lines and boxes represent introns and exons, respectively. Open boxes indicate partial exons, and dotted lines indicate that some sequences of introns are
