# Supplementary material for: The complete mitochondrial genome of Taxus cuspidata (Taxaceae): eight protein-coding genes have transferred to the nuclear genome
Source: PubMed Central journal article supplement (PMC6971862; doi:10.1186/s12862-020-1582-1), 2020-01-20
Supplement: 12862_2020_1582_MOESM12_ESM.pdf [file 12862_2020_1582_MOESM12_ESM.pdf]

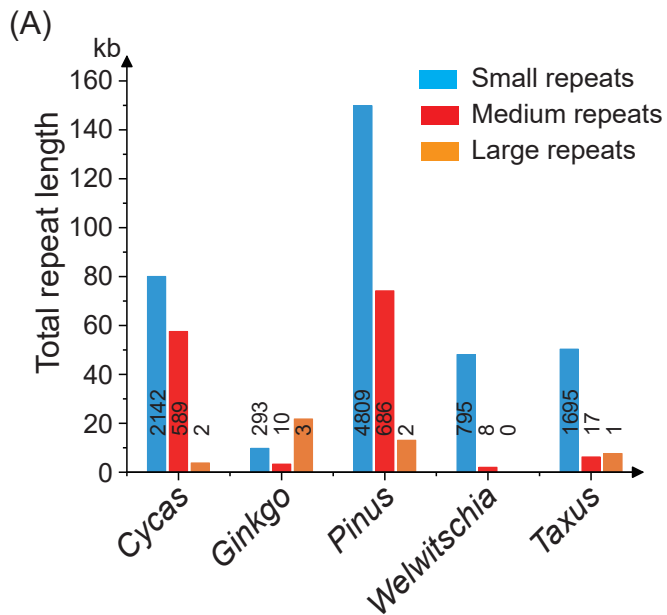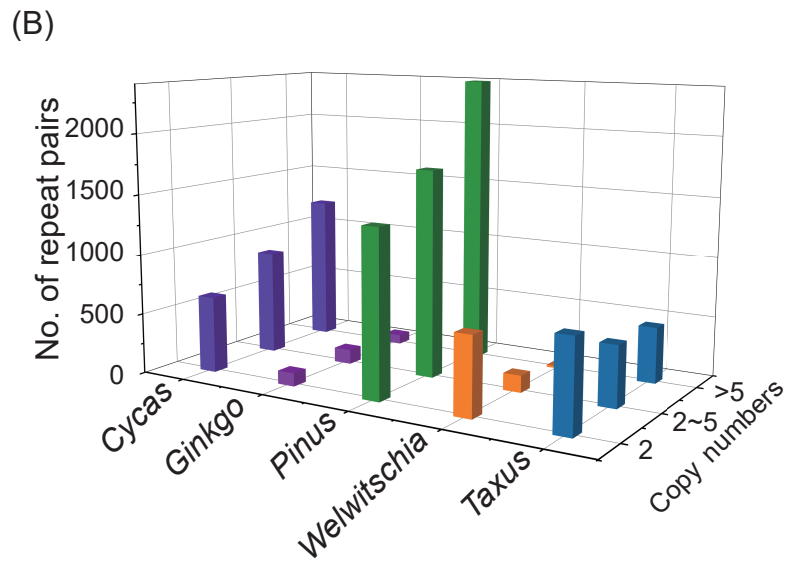

**Additional file 12: Figure S7.** (A) Total length of repeats in the mitogenomes of gymnosperms. The values in the bar indicate the number of repeat pairs. (B) Copy number of repeat pairs in each species.
