# Supplementary material for: The complete mitochondrial genome of Taxus cuspidata (Taxaceae): eight protein-coding genes have transferred to the nuclear genome
Source: PubMed Central journal article supplement (PMC6971862; doi:10.1186/s12862-020-1582-1), 2020-01-20
Supplement: 12862_2020_1582_MOESM14_ESM.pdf [file 12862_2020_1582_MOESM14_ESM.pdf]

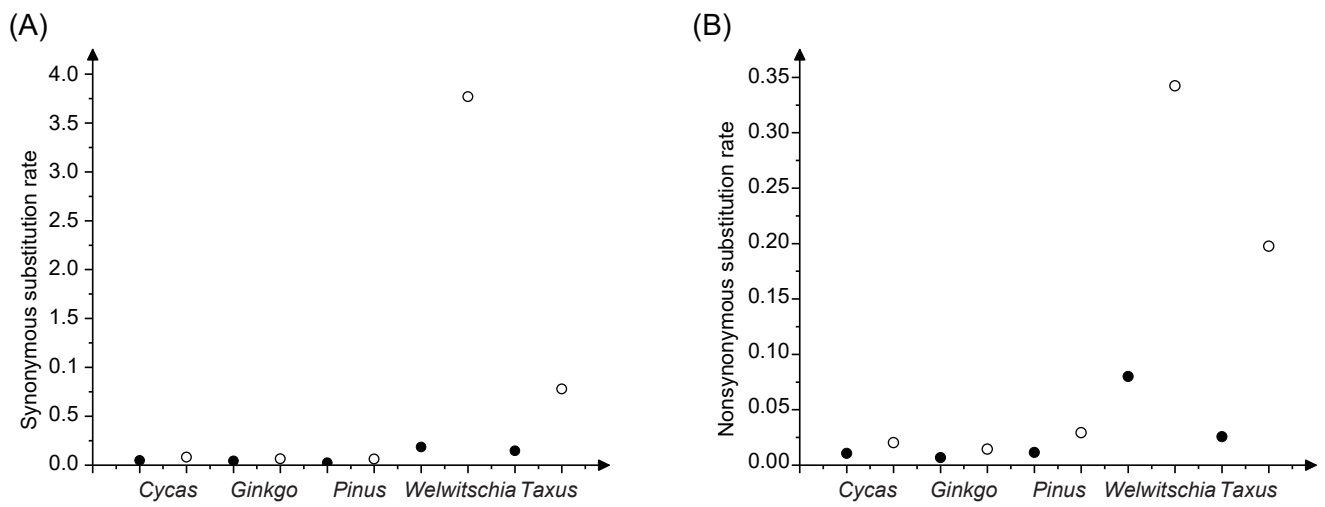

**Additional file 14: Figure S8.** Synonymous (A) and nonsynonymous (B) sequence divergence in the conserved region of mitochondrial protein-coding genes in gymnosperms. Dots indicate mitochondrial protein-coding genes that have not transferred to the nucleus in all five gymnosperm species. Circles indicate the transferred genes in *Taxus* and *Welwitschia* and their homologous genes in *Cycas*, *Ginkgo* and Pinaceae.
